# Supplementary material for: Synthesis of Hierarchical Porous Carbon in Molten Salt and Its Application for Dye Adsorption
Source: Nanomaterials (Basel). 2019 Jul 31;9(8):1098. doi: 10.3390/nano9081098 (PMC6723312; doi:10.3390/nano9081098)
Supplement: Supplementary file 1 [file nanomaterials-09-01098-s001.pdf]

# **Synthesis of hierarchical porous carbon in molten salt and its application for dye adsorption**

Saisai Li<sup>1</sup>, Haijun Zhang<sup>1\*</sup>, Shiya Hu<sup>1</sup>, Jie Liu<sup>1</sup>, Qing Zhu<sup>1</sup>, Shaowei Zhang<sup>2\*</sup>

1 The State Key Laboratory of Refractories and Metallurgy, Wuhan University of Science and Technology, Wuhan 430081, China

2 College of Engineering, Mathematics and Physical Sciences, University of Exeter, Exeter EX4 4QF, UK

\*Corresponding authors, Prof. Dr. Haijun Zhang, E-mail: [zhanghaijun@wust.edu.cn](mailto:zhanghaijun@wust.edu.cn);

Prof. Dr. Shaowei Zhang, E-mail: [s.zhang@exeter.ac.uk](mailto:s.zhang@exeter.ac.uk).

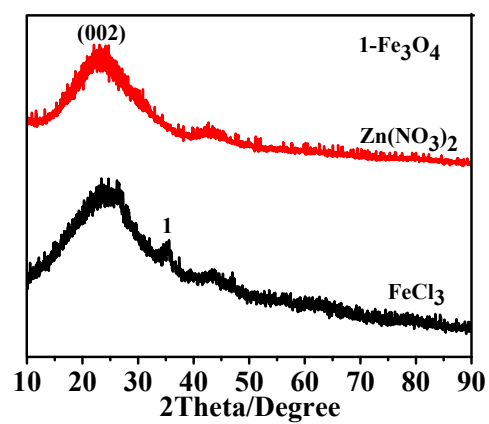

Fig. S1 Powder X-ray diffraction (XRD) pattern of porous carbon prepared at 800°C for 2 h using respectively  $\text{FeCl}_3 \cdot 6\text{H}_2\text{O}$  and  $\text{Zn}(\text{NO}_3)_2$  as oxidizing agents.

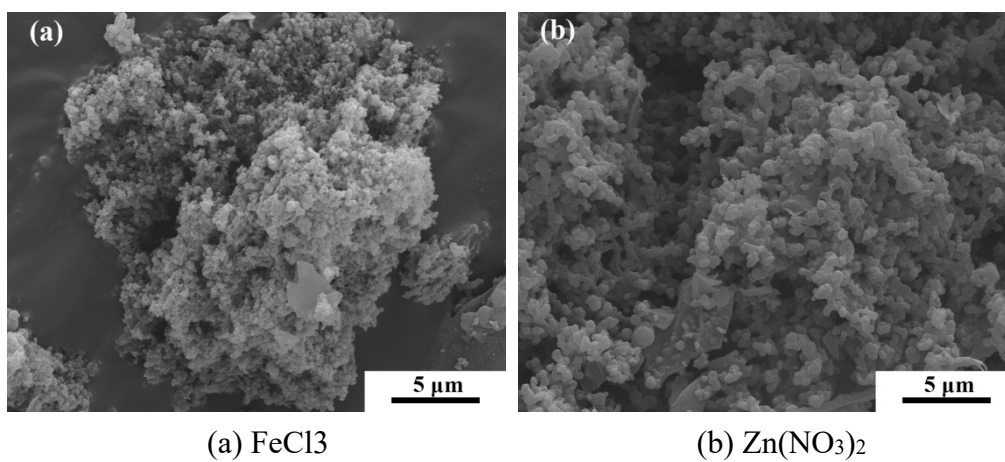

Fig. S2 Scanning electron microscope (SEM) images of porous carbon prepared at  $800^\circ\text{C}$  for 2 h using respectively 1.0 wt%  $\text{FeCl}_3 \cdot 6\text{H}_2\text{O}$  and  $\text{Zn}(\text{NO}_3)_2$  as oxidizing agents.

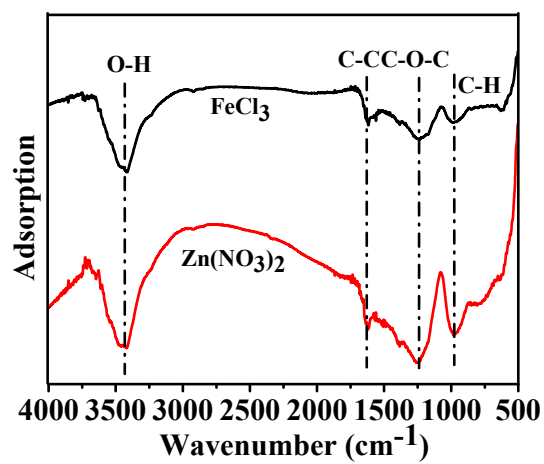

Fig. S3 Fourier transform infrared spectroscopy (FTIR) of porous carbon prepared at 800°C for 2 h using respectively 1.0 wt% FeCl<sub>3</sub>·6H<sub>2</sub>O and Zn(NO<sub>3</sub>)<sub>2</sub> as oxidizing agents.

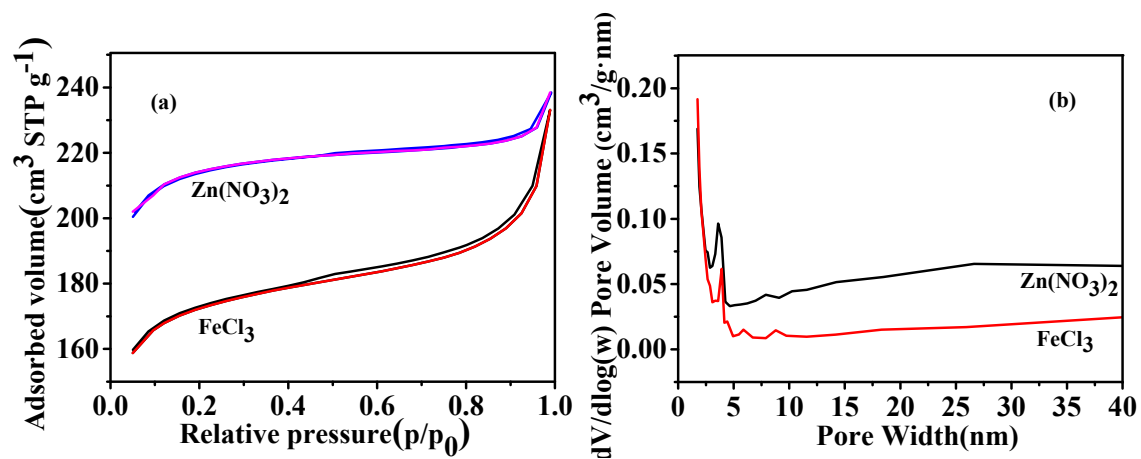

Fig. S4  $N_2$  adsorption-desorption isotherms (a) and pore size distribution curves (b) of porous carbon prepared at 800°C for 2 h with various amounts of Fe.

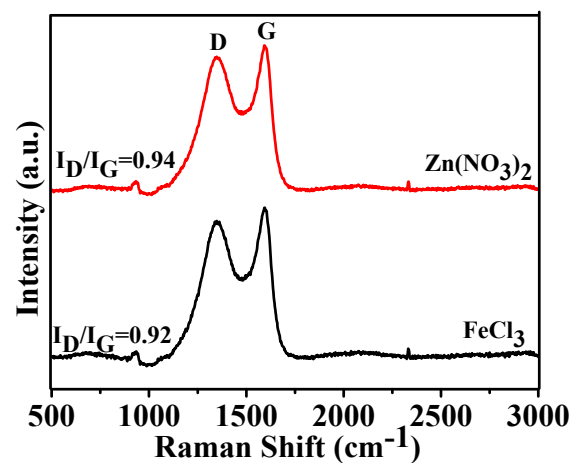

Fig. S5 Raman spectra of porous carbon prepared at 800°C for 2 h using respectively 1.0 wt% FeCl<sub>3</sub>·6H<sub>2</sub>O and Zn(NO<sub>3</sub>)<sub>2</sub> as oxidizing agents.
